# Supplementary material for: Optimal Trade Execution Under Endogenous Order Flow
Source: Atypon-hosted journal article supplement (doi:10.1287/opre.2023.0151), 2025-08-26
Supplement: opre.2023.0151.sm1.pdf [file opre.2023.0151.sm1.pdf]

# Optimal trade execution under endogenous order flow (e-Appendix)

---

Authors are encouraged to submit new papers to INFORMS journals by means of a style file template, which includes the journal title. However, use of a template does not certify that the paper has been accepted for publication in the named journal. INFORMS journal templates are for the exclusive purpose of submitting to an INFORMS journal and are not intended to be a true representation of the article's final published form. Use of this template to distribute papers in print or online or to submit papers to another non-INFORM publication is prohibited.

This e-Appendix provides supplementary materials, including extended technical details and additional results, to support the findings presented in the main paper. It is intended to enhance transparency, reproducibility, and provide deeper insights for interested readers.

## **Appendix A: Optimal execution with generalized Hawkes kernels: The sum of exponential case**

In this section, we broaden the scope of our preceding analyses by considering a more general class of Hawkes processes, focusing particularly on the sum of exponential kernels. This approach offers several key advantages in financial modeling: superior fit to market data, efficient estimation, and versatility in approximation.

### **A.1. Properties and approximation of sum of exponential kernels**

The sum of exponential kernels is given by a function of the form  $h_n(s) = \sum_{i=1}^n \alpha_i e^{-\beta_i s}$  that satisfies the integrability condition  $\int_0^\infty h_n(s) ds < 1$ . We assume that market buy/sell order arrivals follow

independent Hawkes processes  $N^{b/s}$  with respective intensities

$$I_t^{b/s} = \mu + \int_0^t h_n(t-u) dN_u^{b/s} \quad (\text{A.1})$$

For simplification and without compromising generality, we focus our analysis on a non-side specific Hawkes process  $N$ , governed by the intensity function:

$$I_t = \mu + \int_0^t h_n(t-u) dN_u. \quad (\text{A.2})$$

The sum of exponential kernels offers three primary advantages for financial modeling:

1. **Superior Fit:** According to Lallouache and Challet (2016), this kernel demonstrates excellent goodness-of-fit, surpassing other tested kernels like the power law with an exponential cut-off and modified power law. Notably, the sum of exponential kernel, even with just two terms, provides better fit than mono-exponential kernels and rivals more complex alternatives for fitting high frequency data on an hourly basis.

2. **Efficient Estimation:** Its Maximum Likelihood Estimation (MLE) can be efficiently approximated in  $O(N)$  time, offering a significant improvement over the  $O(N^2)$  complexity of other methods. This approach has been adopted in literature, for instance Hardiman et al. (2013), to estimate Hawkes processes with a power law kernel.

3. **Versatility in Approximation:** The sum of exponentials kernel can approximate any continuous Hawkes kernel with an increased number of exponential terms, as we demonstrate below.

The following lemma formalizes the approximation capability of sums of exponential functions:

**LEMMA 1 (Zhu (2015), Lemma 11).** *If  $h(t) > 0$ ,  $\int_0^\infty h(t) dt < \infty$ ,  $\lim_{t \rightarrow \infty} h(t) = 0$ , and  $h$  is continuous, then  $h$  can be approximated by a sum of exponential functions, both in the  $L^1$  and the  $L^\infty$  norm.*

Let  $h_n$  be an excitation function of the form

$$h_n(s) = \sum_{i=1}^n \alpha_i e^{-\beta_i s} \quad (\text{A.3})$$

and let us denote by  $N^n$  the Hawkes process with intensity

$$I_t^n = \mu + \int_0^t h_n(t-u) dN_u^n. \quad (\text{A.4})$$

It follows from (Zhu 2015, Theorem 12) (and its proof) that the log moment generating function of  $N_n$  asymptotically approximates that of  $N_g$  as  $n \rightarrow \infty$ . More precisely, the following holds:

**THEOREM 1.** *Let  $P$ , respectively  $P_n$ , denote the probability measures under which  $N$ , respectively  $N^n$ , follows the Hawkes process with exciting function  $h$ , respectively  $h_n$ , such that  $h_n \rightarrow h$  as  $n \rightarrow \infty$  in both  $L^1$  and  $L^\infty$  norms. For any  $\theta \in \mathbb{R}$  let*

$$\Gamma(\theta) = \lim_{t \rightarrow \infty} \frac{1}{t} \log \mathbb{E}^P [e^{\theta N_t}] \quad \text{and} \quad \Gamma_n(\theta) = \lim_{t \rightarrow \infty} \frac{1}{t} \log \mathbb{E}^{P_n} [e^{\theta N_t^n}]. \quad (\text{A.5})$$

Then

$$\lim_{n \rightarrow \infty} \Gamma_n(\theta) = \Gamma(\theta). \quad (\text{A.6})$$

The previous theorem establishes that a Hawkes process with a kernel comprising a sum of exponential functions serves as a practical approximation for empirically relevant Hawkes processes, including those with power-law kernels that are frequently used in empirical finance literature.

## A.2. Risk-neutral liquidation with sum of exponential kernels

We now present the key results for the optimal liquidation problem when market order arrivals follow a Hawkes process with a sum of  $K$  exponential kernels. The objective function to minimize is:

$$L(\xi) := \eta \int_0^T \xi_t^2 dt - \sum_{i=1}^K \gamma_i \int_0^T \xi_t \int_0^t \xi_s e^{-\omega_i(t-s)} ds dt. \quad (\text{A.7})$$

Let  $A_j = -\frac{\gamma_j}{2\eta}$  and  $B_j = -\omega_j$ . The necessary condition for optimality is:

$$\xi(t) + \sum_{j=1}^K A_j I_j(t) = C \quad (\text{A.8})$$

where  $C$  is a positive constant and:

$$I_j(t) = \int_0^T \xi(s) e^{B_j|t-s|} ds = \int_0^t e^{B_j(t-s)} \xi(s) ds + \int_t^T e^{B_j(s-t)} \xi(s) ds \quad (\text{A.9})$$

Through differentiation of equation (A.9), we can establish:

$$I_j^{(2)}(t) = 2B_j \xi(t) + B_j^2 I_j(t) \quad (\text{A.10})$$

This allows us to transform the integral equation into an ODE. By further differentiation and substitution, we obtain a linear ODE of order  $2K$ :

$$\xi^{2K}(t) + \kappa_{(K,1)}\xi^{(2(K-1))}(t) + \cdots + \kappa_{(K,K)}\xi(t) = (-1)^K \sum_{j=1}^K B_{K-j}^2 C \quad (\text{A.11})$$

where the coefficients  $\kappa$  can be computed recursively.

The full verification that our candidate strategy is indeed optimal follows the same approach as in the classical case. We can prove that for sufficiently large instantaneous impact parameter  $\eta$ , specifically when  $\eta > \sum_{i=1}^n \frac{\gamma_i}{\omega_i}$ , the cost function  $L(\xi)$  is strictly positive for any admissible strategy. This verification extends our previous results while maintaining the essential linear-quadratic structure of the problem.

For any fixed admissible strategy  $\xi$  we set  $\Xi_t := \mathbf{1}_{[0,T]}(t)\xi_t$  for  $t \in \mathbb{R}$  and get that

$$\begin{aligned} L(\xi) &= \eta \int_0^T \xi_t^2 - \sum_{i=1}^n \left[ \gamma_i \int_0^T \xi_t \int_{t>s} \xi_s e^{-\omega_i(t-s)} ds dt \right] \\ &= \eta \int_{\mathbb{R}} \Xi_t^2 - \sum_{i=1}^n \left[ \gamma_i \int_{\mathbb{R}} \Xi_t \int_{t>s} \Xi_s e^{-\omega_i(t-s)} ds dt \right] \end{aligned}$$

Using Plancherel's theorem and the symmetry of the exponential kernel, we have:

$$L(\xi) = \eta \int_{\mathbb{R}} |\hat{\Xi}_z|^2 dz - \sum_{i=1}^n \left[ \gamma_i \frac{1}{2} \int_{\mathbb{R}} \Xi_t \int_{\mathbb{R}} \Xi_s e^{-\omega_i|t-s|} ds dt \right]$$

Since the exponential decay function is the Fourier transform of a Lorentzian function, this yields:

$$\begin{aligned} L(\xi) &= \eta \int_{\mathbb{R}} |\hat{\Xi}_z|^2 dz - \sum_{i=1}^n \left[ \gamma_i \frac{1}{2} \int_{\mathbb{R}} \Xi_t \int_{\mathbb{R}} \Xi_s \int_{\mathbb{R}} \frac{2\omega_i}{\omega_i^2 + 4\pi^2 z^2} e^{-2\pi i(t-s)z} dz ds dt \right] \\ &= \eta \int_{\mathbb{R}} |\hat{\Xi}_z|^2 dz - \sum_{i=1}^n \left[ \gamma_i \int_{\mathbb{R}} \Xi_t e^{-2\pi i z t} dt \int_{\mathbb{R}} \Xi_s e^{2\pi i z s} ds \int_{\mathbb{R}} \frac{\omega_i}{\omega_i^2 + 4\pi^2 z^2} dz \right] \\ &= \eta \int_{\mathbb{R}} |\hat{\Xi}_z|^2 dz - \sum_{i=1}^n \left[ \gamma_i \left( \int_{\mathbb{R}} \Xi_t e^{-2\pi i z t} dt \right) \left( \int_{\mathbb{R}} \overline{\Xi_s e^{-2\pi i z s}} ds \right) \int_{\mathbb{R}} \frac{\omega_i}{\omega_i^2 + 4\pi^2 z^2} dz \right] \\ &= \eta \int_{\mathbb{R}} |\hat{\Xi}_z|^2 dz - \sum_{i=1}^n \left[ \gamma_i \int_{\mathbb{R}} |\hat{\Xi}_z|^2 \frac{\omega_i}{\omega_i^2 + 4\pi^2 z^2} dz \right] \\ &= \int_{\mathbb{R}} |\hat{\Xi}_z|^2 \left( \eta - \sum_{i=1}^n \left[ \gamma_i \frac{\omega_i}{\omega_i^2 + 4\pi^2 z^2} \right] \right) dz. \end{aligned}$$

Thus, if  $\eta > \sum_{i=1}^n \frac{\gamma_i}{\omega_i}$ , then  $L(\xi) > 0$

## Appendix B: Instantaneous impact factor estimation from stochastic orderbook

The instantaneous impact parameter has been estimated by several works before, where the executed price is assumed to be linearly proportional to market order size and the instantaneous factor can be estimated by feeding a hypothetical market order of large size by walking the LOB; see Cartea and Jaimungal (2015) and Chen et al. (2018). While this offers a tractable representation of the orderbook for mathematical model, it is only an approximation of the visible (observed) orderbook for two reasons:

- **Price discretization** Stocks are often transacted in tick size, which determines the minimum price amount a security can change. Consequently, prices in the orderbook can only be multiples of tick size. Thus, the executed price is a step function of the total executed shares.
- **Liquidity fluctuation** As mentioned in Tóth et al. (2011), the liquidity posted in the visible orderbook may or may not reflect the true supply and demand of the market. Rather, it is often a consequence of high frequency market makers adjusting their quotes to avoid adverse selection cost, and therefore only a small amount of liquidity posted near the best bid-offer is capturable at any one time.

Given the stochastic nature of liquidity, one cannot directly use the orderbook data to estimate the instantaneous cost factor. This advocates to measure the average instantaneous market impact based on a steady-state profile of the orderbook. We follow the previous works to model orderbook, but account for price discretization and random fluctuation in standing volume.

We consider a Limit Order Book (LOB) model with total depth of  $S$  price levels. The LOB is described by the bid/ask side liquidities  $L_i^{b/a}$  standing at the  $i$ -th price level away from the best bid/offer price. Instead of assuming the price level grid is fixed with equidistance (e.g. 1 tick) which may introduce “holes” in the book with 0 standing liquidity ( $L_{i_0}^{b/a} = 0$  for some  $i_0$ ) for certain stocks and bring variations in book reconstruction, we build (bid side) LOB samples with positive standing liquidities at any price level as follows:

Let  $M_0 := L_0^b$ . By definition  $M_0 > 0$ . Let  $\Delta P_0 := 0$  and  $S_0 := \#\{i \in \{0, \dots, S\} : L_i^b > 0\}$ . We now define a sequence of price offsets  $\Delta P_i$  and standing liquidities  $M_i$  recursively by

$$\Delta P_i := \inf\{j > \Delta P_{i-1} : L_j^b > 0\} \quad \text{and} \quad M_i := L_{\Delta P_i}^b, \quad i = 1, \dots, S_0.$$

In particular, the liquidity standing  $\Delta P_i$  ticks into the book is given by  $M_i$ . The aggregate liquidity up to price level  $\Delta P_i$  is denoted

$$m_i = \sum_{j=0}^i M_j.$$

The state of the LOB at any given time can be fully described by a random vector  $\{(M_i, \Delta P_i)\}_{i=0, \dots, S_0}$ .

Compared to simply taking averages of, say 10-second LOB snapshots, a nonparametric density estimation provides comprehensive stochastic behaviours of the random variables, and more importantly, a better estimate of transaction cost, especially when the distribution deviates from Gaussian with asymmetry and/or heavy tails. Estimating joint density of multi vector is challenging. Given that the price grid is determined by the availability of standing liquidity, we replace the random offsets by their empirical averages, still denoted  $\Delta P_i$ . In this case, the offsets are assumed to be deterministic, the distribution of the vector  $\{M_i\}_{i=0, \dots, S_0}$  allows to compute the cost function

$$P(v) := \frac{1}{v} \mathbb{E} \left[ \sum_{j=1}^S \mathbf{1}_{\{m_{j-1} < v \leq m_j\}} \left\{ \sum_{i=1}^j M_{i-1} \Delta P_{i-1} + (v - m_j) \Delta P_j \right\} \right].$$

This is still too complicated; estimating the high dimensional joint distribution of the standing liquidity is prone to the curse of dimensionality; see Gramacki (2017). To balance bias and variance tradeoff, we considered the modified function

$$\hat{P}(v) = \frac{1}{v} \sum_{i=0}^S \mathbb{E} \left[ m_{i-1} \Delta P_{i-1} + (v - m_i) \Delta P_i \mid m_i < v \leq m_{i+1} \right] \mathbb{P}(m_i < v \leq m_{i+1}).$$

The modified version is clearly biased. It assumes that our order, when clearing up to level  $i$ , will be priced at the most aggressive price  $\Delta P_i$  instead of the average price  $\frac{\sum_{j=0}^i M_j \Delta P_j}{\sum_{j=0}^i M_j}$ . This inflates the price impact in the estimation, leading to larger value of  $\eta$ . Conversely, it provides a very conservative estimator of the cost improvement of our trading strategy over TWAP. The numerical benefit of using the modified function is that it only needs to estimate separately the joint distributions at two levels  $(m_i, m_{i+1})$  each time, which lowers estimation variance and speeds up computation.

We use kernel density to estimate the joint probability density function, denoted by  $f_{x,y}$ , of two random variable  $x = m_i$  and  $y = m_{i+1}$ . Letting  $\mathbf{X}_t = (x_1, x_2, \dots, x_n)$  and  $\mathbf{Y}_t = (y_1, y_2, \dots, y_n)$  be samples drawn from the distribution of  $m_i$  and  $m_{i+1}$  we have:

$$\hat{f}_{x,y} = n^{-1} \sum_{t=1}^n K_{\mathbf{H}}(\mathbf{x} - \mathbf{X}_t)(\mathbf{y} - \mathbf{Y}_t)$$

where  $K_{\mathbf{H}}(\mathbf{x}, \mathbf{y}) = |\mathbf{H}|^{-1/2} K(\mathbf{x}, \mathbf{y}) |\mathbf{H}|^{-1/2}$  is the kernel and  $\mathbf{H}$  is the bandwidth matrix. We consider the Gaussian kernel<sup>1</sup> in our estimation.

To measure our instantaneous market impact, we first simulate the orderbook in its stationary state. We then submit orders with different size  $v$  (multiples of 1, ..., 20 average market order sizes<sup>2</sup>) and compute the market impact  $\hat{P}(v)$  of each order on the simulated book. Finally, we estimate the instantaneous market impact factor  $\eta$  in the linear relationship

$$\hat{P}(v) = \eta v + \epsilon$$

where  $\epsilon \sim N(0, \sigma_\epsilon)$  and  $\hat{P}(v)$  is the change in price per share after we submit our market orders of size  $v$ .

In the estimation, the density of liquidity is calibrated using kernel density estimation based on the quote data snapshots at  $\{t_i\}_{i=1}^n$  sampled within each bin of  $T = 1$ . We consider up to 20 times the size of AMO or the linearity is not violated<sup>3</sup>, which in all cases lead up to first  $S = 5$  levels of orderbook data.

### Appendix C: Permanent impact factor estimation using order flow imbalance

In the theoretical framework, orders are supposed to have the same permanent impact. In other words, the value of permanent impact will not be influenced by individual agent's action and market timing. While one can measure the change in fundamental price at each trade directly, it often leads to large variance due to the presence of microstructure noise. To obtain a robust estimation, we measure the average change in fundamental price after a certain amount of liquidity has been removed from the market. Specifically, we adopt the idea of Cont et al. (2013), which estimates

<sup>1</sup> Note that the kernel only serves as a smoothing function for data within the bandwidth, and it does not mean we assume normal distribution, or any distribution in particular.

<sup>2</sup> To ensure the assumption of orderbook recovered within  $\Delta t$  reasonable, we only submit orders of the average market order's size, with a trading rate at a fraction of the average market order's arrival rate.

<sup>3</sup> We check for linearity in the regression and only use up to  $X$  number of AMOs until the linearity is violated.

permanent impact based on the linear relation between price change and *order flow imbalance* (OFI), defined as the imbalance between supply and demand at the best bid and ask prices.

Over a time interval  $[t_{i-1}, t_i]$ , the order flow imbalance is a sum of changes for every liquidity event:

$$OFI_i = \sum_{s=C(t_{i-1})+1}^{C(t_i)} e_s$$

where  $C(\cdot)$  denotes the count of all the best-bid offer (BBO) change events (add/delete/trade) and  $e_s$  denotes the changes in liquidity at BBO. For a detailed guide how  $e_s$  is measured, we refer to the original paper Cont et al. (2013). The permanent market impact factor is estimated with a linear regression equation

$$\Delta P_i = \lambda OFI_i + \epsilon_i$$

where  $\lambda$  is the price impact coefficient applied to each share,  $\Delta P_i$  refers to the price change over the time interval, and  $\epsilon_i$  is a noise term. In other words, we estimate the permanent impact at frequency  $\Delta t$ , that is, the same duration for every interval  $[t_{i-1}, t_i]$ , and balance the bias and variance tradeoff in the market microstructure. We report the average R-squared of the linear regression for each stock in Appendix. Similar to the results reported in Cont et al. (2013), the regression fits data reasonably well, with R-squared around 41.01% – 71.10% .

#### **Appendix D: Hawkes process estimation using maximum likelihood estimation**

We use Hawkes process to model the dynamics of order arrivals. There are several issues to be addressed in the estimation:

- **Artificial trade clustering.** While the self-exciting effects of Hawkes process are related to the degree of endogeneity of how much parent orders trigger child orders, there is no detailed information in public data. In other words, we cannot distinguish the parent-child relationship among the orders. This is further complicated by the nature of high frequency market data, in which events are clustering together not due to their relationship, but possibly due to the distribution mechanism of market data (Filimonov and Sornette (2015)). For example, during a general market event such as index movement, it is reasonable to expect a flurry of limit orders submitted at almost the same time as traders are to hedge their position to reduce adverse selection risk. The exchange will first match each order in FIFO order, then redistribute the trade to every market participant. This creates an artificial stream of trades that resembles herding effects. We aggregate multiple trades over a super-short interval of 100 milliseconds to avoid capturing such artificial herding effects in estimation induced by the microstructure effect.

- **Mixture of herding and splitting effect.** In addition to endogeneity, the self-exciting effects of Hawkes process is attributed to the splitting of a big meta-order into multiple child orders (Tóth et al. (2014)). Without proprietary data, it is hard to obtain the detailed information. Filimonov and Sornette (2015) shows that the splitting effect results in an overestimation for the Hawkes process, with the estimated branching ratio close to the critical value of 1. The overestimation will become more serious for a long sample period. We assume that the Hawkes process is stationary<sup>4</sup>. In our estimation, we slice data into the hourly bins and estimate the parameters over each bin. This alleviates the bias in estimation, but potentially at the cost of larger variance. We take the median of all the estimates as a robust estimate to balance the bias and variance tradeoff.

- **Misspecification of Hawkes's kernel** We chose an exponential kernel in the estimation, in accordance with the model set up.<sup>5</sup> To verify the accuracy, we perform goodness-of-fit testing of the residuals of the fitted Hawkes process with the exponential kernel. In general, the exponential Hawkes process fits the data reasonably well, as the test in general cannot reject the null hypothesis at 10% significance level.

- **Seasonality effect:** Diurnal pattern is known in trading, and can be vital in estimating Hawkes process's branching ratio using high frequency data. The average number of trades is not constant over the day, but often follows a U-shape with peaks of trading volumes near the opening and close auctions. As shown in Wehrli et al. (2021), not controlling the seasonality effect can lead to critical Hawkes's branching ratio. Consequently, by removing the open and close and using data from 10 AM to 3 PM only, we lower the disturbance of seasonal effect to stationarity.

For each sample over  $T = 1$  hour, we conduct the maximum likelihood estimation for the Hawkes process. The log-likelihood function is as follows:

$$\log L(t_1, t_2, \dots, t_n) = -\mu t_n + \sum_{i=1}^n \left[ \frac{\alpha}{\beta} (e^{-\beta(t_n - t_i)} - 1) \right] + \sum_{i=1}^n \log(\mu + \alpha A(i))$$

where  $A(i) = \sum_{t_j < t_i} e^{-\beta(t_i - t_j)}$ , and  $\mu$  is the average number of market orders over the sample period. The parameter  $\alpha$  is the strength of the self-exciting effect. For  $\alpha = 1.0$ , it means a 100% self-exciting effect, in the sense that each immigrant order will be replicated fully over the sample period if there is no decay. The parameter  $\beta$  is the strength of the decaying effect. For  $\beta = 1.0$ , it expects a

<sup>4</sup> This is a necessary condition to obtain closed-form solutions.

<sup>5</sup> We are aware that many other kernels including power law kernels have been suggested in the literature; see, e.g. Gatheral (2011) and Hawkes (2018) among many others. The choice of exponential kernels allows us to obtain closed-form solutions.

100% decaying effect in the exponential term. We report the mean and statistical significance of the estimates using Anderson Darling test across subsamples of each stock in the e-Appendix. The statistics show that the fits of Hawkes process are reasonable.

### Appendix E: Square-root law market impact and benchmark

A standard method to measure market impact is the square-root formula, which is:

$$\Delta P = c\sigma \sqrt{\frac{x_0}{V}}$$

where  $\Delta P$  is the price change from executing  $x_0$  shares, with  $\sigma$  is the volatility of the fundamental price and  $V$  is average daily market volume.  $c$  is a constant that depends on market, but often of order unity; see, for example, Tóth et al. (2011) for more details. The corresponding square root cost formula is then

$$c\sigma \sqrt{\frac{x_0}{V}} x_0.$$

While the square root does not factor directly in our estimation, it serves as a good benchmark for reasonable estimation of market impact. We would expect the market impact generated by square-root law to be in the same magnitude as our fixed cost component in the total cost equation. The fixed cost can be decomposed into a market linear impact component and the number of shares executed as

$$(\gamma + \lambda) \frac{x_0}{2} x_0$$

The results (assuming  $c = 1$ ) are presented in Table 10 and Table 11. In general, the fixed cost and square-root cost are in the same magnitude, implying our cost calculation is reasonable.

### Appendix F: Goodness-of-fit testing for univariate Hawkes process using Anderson-Darling test

The goodness-of-fit for the estimation of Hawkes processes can formally be tested using residual analysis. Specifically, consider a univariate Hawkes process  $N$  with conditional intensity  $i(t)$ , and the corresponding compensator function  $I(t)$

$$I(t) = \int_0^t i(s) ds$$

Define a scaled point process  $S$  for all  $\{t_i : i \in N_t\}$  where

$$S(t_i) = I(t_i)$$

**Table 1** Anderson-Darling critical value table for standard exponential distribution for 200 observations.

| Significance level | 10%   | 5%    | 2.5%  | 1%    |
|--------------------|-------|-------|-------|-------|
| Critical value     | 1.075 | 1.337 | 1.601 | 1.951 |

then  $S$  is a standard Poisson process (Daley and Vere-Jones (2003)). The goodness-of-fit test can then be performed on the residual process  $R$  where

$$R(t_i) = S_i - S_{i-1}$$

under the null hypothesis that  $R$  is exponentially distributed with rate 1. We use the Anderson-Darling test (Anderson and Darling (1952)) to test if sample residuals came from a population with a standard exponential distribution. While the exact critical values depend on the number of observations in each stock, a rough estimation of critical values against significance levels is provided in Table (1).

## Appendix G: Empirical results

**Table 2** The average of goodness of fit measures and the general statistics per symbol (from index 1 to 27). Residual statistic refers to the Anderson-Darling test statistic for the Hawkes process, while OFI R2 refers to the R-squared measure of the linear regression for the permanent impact factors. In general, the goodness of fit measures are in the expected range.

| symbol | Tick  | Volume | Volatility | Residual statistic | OFI R2 |
|--------|-------|--------|------------|--------------------|--------|
| ANSS   | 0.470 | 93.920 | 1.695      | 1.069              | 36.563 |
| JKHY   | 0.700 | 55.491 | 1.181      | 1.040              | 29.121 |
| FFIV   | 0.730 | 90.035 | 1.797      | 0.972              | 39.152 |
| AZPN   | 0.780 | 51.697 | 2.252      | 1.108              | 26.838 |
| PFPT   | 0.810 | 84.907 | 2.254      | 1.419              | 30.714 |
| BLUE   | 0.910 | 68.981 | 2.648      | 1.294              | 42.912 |
| NDAQ   | 1.010 | 70.441 | 1.431      | 0.990              | 59.320 |
| MRTX   | 1.110 | 53.630 | 3.688      | 0.990              | 25.594 |
| GRMN   | 1.210 | 85.427 | 1.585      | 1.362              | 40.873 |
| BPMC   | 1.210 | 35.373 | 2.770      | 0.958              | 38.654 |
| UTHR   | 1.230 | 40.201 | 1.741      | 1.094              | 35.246 |
| INCY   | 1.250 | 86.779 | 1.942      | 1.064              | 54.772 |
| VSAT   | 1.290 | 25.463 | 1.354      | 0.932              | 25.436 |
| QRVO   | 1.350 | 85.128 | 1.738      | 1.180              | 38.454 |
| EXPD   | 1.370 | 66.622 | 1.503      | 1.199              | 53.799 |
| OLLI   | 1.410 | 91.053 | 3.901      | 1.041              | 47.076 |
| AAXJ   | 1.490 | 85.619 | 0.942      | 1.139              | 65.364 |
| YY     | 1.670 | 56.451 | 2.201      | 1.144              | 31.539 |
| FIVN   | 1.790 | 41.790 | 3.102      | 1.014              | 28.398 |
| PFG    | 1.790 | 60.807 | 1.660      | 1.235              | 60.055 |
| BPOP   | 1.840 | 27.665 | 1.457      | 1.052              | 29.692 |
| XRAY   | 1.860 | 84.242 | 1.249      | 0.751              | 80.312 |
| AMBA   | 1.900 | 35.495 | 2.948      | 1.254              | 36.716 |
| FLIR   | 1.940 | 39.007 | 1.636      | 1.038              | 63.165 |
| GBT    | 1.960 | 37.025 | 2.534      | 0.925              | 25.530 |
| APPN   | 2.140 | 32.233 | 3.514      | 1.061              | 33.078 |
| HUBG   | 2.280 | 11.090 | 2.058      | 0.641              | 25.799 |

**Table 3** The average of goodness of fit measures and general statistics per symbol (from index 28 to 54). Residual statistic refers to the Anderson-Darling test statistic for the Hawkes process, while OFI R2 refers to the R-squared measure of the linear regression for the permanent impact factors. In general, the goodness of fit measures are in the expected range.

| symbol | Tick  | Volume | Volatility | Residual statistic | OFI R2 |
|--------|-------|--------|------------|--------------------|--------|
| FGEN   | 2.360 | 22.600 | 2.532      | 1.063              | 30.846 |
| PLAY   | 2.480 | 38.940 | 2.038      | 1.167              | 46.816 |
| ACGL   | 2.500 | 50.322 | 1.155      | 0.836              | 83.466 |
| RGNX   | 2.520 | 22.328 | 3.918      | 0.894              | 42.310 |
| PCRX   | 2.530 | 27.176 | 2.207      | 1.229              | 35.101 |
| ADPT   | 2.670 | 18.939 | 4.951      | 1.169              | 27.943 |
| MMSI   | 2.690 | 32.375 | 5.064      | 1.124              | 31.065 |
| SHOO   | 2.950 | 22.166 | 2.649      | 1.239              | 31.250 |
| MOMO   | 2.960 | 77.758 | 2.851      | 0.919              | 74.486 |
| CORE   | 3.010 | 8.411  | 2.075      | 0.761              | 27.877 |
| BECN   | 3.010 | 20.283 | 3.074      | 1.122              | 31.468 |
| TLRY   | 3.060 | 51.187 | 4.724      | 1.100              | 26.106 |
| ACIW   | 3.180 | 21.586 | 1.839      | 0.754              | 61.509 |
| ARWR   | 3.220 | 40.316 | 3.298      | 1.080              | 52.136 |
| CATM   | 3.300 | 14.756 | 2.682      | 0.791              | 26.466 |
| SLGN   | 3.320 | 12.144 | 1.170      | 0.939              | 37.447 |
| PPC    | 3.420 | 31.036 | 1.986      | 1.084              | 68.245 |
| PDCE   | 3.550 | 42.968 | 3.670      | 1.224              | 51.914 |
| APLS   | 3.670 | 14.353 | 3.517      | 0.844              | 28.977 |
| FHB    | 3.810 | 18.201 | 1.469      | 1.073              | 65.118 |
| VCYT   | 3.880 | 16.668 | 3.658      | 1.126              | 26.943 |
| NSTG   | 3.970 | 12.034 | 3.546      | 1.054              | 27.579 |
| RDUS   | 4.000 | 13.151 | 2.773      | 0.760              | 31.261 |
| HCSG   | 4.010 | 21.587 | 3.593      | 0.866              | 41.445 |
| NTNX   | 4.110 | 89.122 | 3.396      | 1.085              | 76.948 |
| BCOR   | 4.160 | 9.861  | 3.002      | 0.954              | 36.839 |
| IRDM   | 4.230 | 18.724 | 2.902      | 0.987              | 31.307 |
| SABR   | 4.340 | 37.143 | 1.384      | 0.873              | 76.742 |

**Table 4** The average of goodness of fit measures and general statistics per symbol (from index 55 to 81). Residual statistic refers to the Anderson-Darling test statistic for the Hawkes process, while OFI R2 refers to the R-squared measure of the linear regression for the permanent impact factors. In general, the goodness of fit measures are in the expected range.

| symbol | Tick  | Volume | Volatility | Residual statistic | OFI R2 |
|--------|-------|--------|------------|--------------------|--------|
| SFIX   | 4.400 | 65.906 | 3.297      | 0.790              | 58.067 |
| DENN   | 4.490 | 10.146 | 1.269      | 1.181              | 38.205 |
| AERI   | 4.510 | 25.962 | 3.934      | 1.286              | 36.199 |
| CARA   | 4.530 | 15.945 | 3.230      | 1.125              | 35.094 |
| AIMT   | 4.610 | 20.501 | 3.713      | 1.018              | 33.422 |
| IOVA   | 4.680 | 26.899 | 2.828      | 1.316              | 46.464 |
| HAIN   | 4.730 | 24.093 | 2.570      | 0.947              | 80.205 |
| MTSI   | 4.980 | 11.976 | 2.728      | 1.185              | 42.182 |
| BLDR   | 5.130 | 21.257 | 1.955      | 1.010              | 82.385 |
| PENN   | 5.210 | 31.640 | 2.149      | 0.730              | 78.538 |
| GOSS   | 5.240 | 8.684  | 4.808      | 0.921              | 31.964 |
| INSM   | 5.330 | 22.642 | 3.376      | 1.303              | 36.882 |
| HOMB   | 5.360 | 10.983 | 1.771      | 1.000              | 65.677 |
| HRTX   | 5.400 | 17.204 | 3.162      | 1.160              | 34.804 |
| LSCC   | 5.410 | 34.718 | 3.318      | 1.084              | 67.626 |
| FATE   | 5.580 | 13.129 | 3.669      | 1.158              | 31.986 |
| PETS   | 5.610 | 16.283 | 4.946      | 0.774              | 39.979 |
| SVMK   | 5.690 | 21.277 | 2.900      | 1.410              | 60.608 |
| ONB    | 5.830 | 15.219 | 1.349      | 0.744              | 84.091 |
| TVTY   | 5.910 | 11.451 | 2.986      | 1.043              | 62.479 |
| LAUR   | 6.050 | 20.994 | 2.021      | 1.174              | 80.312 |
| UMPQ   | 6.140 | 20.685 | 1.597      | 0.748              | 80.308 |
| CVET   | 6.150 | 31.268 | 7.033      | 1.378              | 79.299 |
| HALO   | 6.170 | 11.764 | 1.647      | 1.062              | 42.199 |
| RTRX   | 6.620 | 9.330  | 4.129      | 0.686              | 43.557 |
| UPWK   | 6.670 | 13.584 | 2.429      | 1.060              | 59.427 |
| MRNA   | 6.690 | 31.120 | 3.235      | 1.128              | 62.285 |
| IMMU   | 6.760 | 30.598 | 3.724      | 1.010              | 79.406 |

**Table 5** The average of goodness of fit measures and general statistics per symbol (from index 82 to 110). Residual statistic refers to the Anderson-Darling test statistic for the Hawkes process, while OFI R2 refers to the R-squared measure of the linear regression for the permanent impact factors. In general, the goodness of fit measures are in the expected range.

| symbol | Tick   | Volume | Volatility | Residual statistic | OFI R2 |
|--------|--------|--------|------------|--------------------|--------|
| GLNG   | 6.900  | 18.958 | 3.405      | 1.161              | 68.000 |
| FEYE   | 6.940  | 50.983 | 2.055      | 1.050              | 81.132 |
| REGI   | 7.040  | 10.635 | 2.856      | 0.705              | 46.641 |
| GT     | 7.290  | 47.864 | 2.767      | 0.847              | 82.756 |
| NWSA   | 7.320  | 33.603 | 1.575      | 1.143              | 77.699 |
| CHNG   | 7.450  | 17.828 | 3.017      | 0.911              | 43.489 |
| QNST   | 7.500  | 8.155  | 4.457      | 0.846              | 72.596 |
| NAVI   | 7.660  | 24.800 | 2.417      | 0.962              | 79.896 |
| WIFI   | 7.760  | 9.220  | 3.411      | 1.293              | 47.949 |
| SONO   | 7.870  | 15.684 | 2.778      | 0.766              | 74.574 |
| PAYS   | 7.930  | 19.838 | 6.256      | 0.889              | 45.796 |
| ISBC   | 8.810  | 20.013 | 1.309      | 1.139              | 79.714 |
| TTMI   | 8.980  | 11.311 | 3.035      | 0.717              | 74.316 |
| VLY    | 9.220  | 17.048 | 1.531      | 0.880              | 80.777 |
| AMAG   | 9.280  | 11.548 | 5.279      | 0.784              | 50.451 |
| SGMO   | 9.500  | 15.949 | 2.624      | 0.890              | 74.397 |
| MDRX   | 9.640  | 16.961 | 2.095      | 0.908              | 77.541 |
| FLEX   | 9.750  | 50.250 | 2.835      | 0.921              | 76.403 |
| PBYI   | 10.040 | 14.636 | 5.170      | 0.958              | 55.007 |
| IRWD   | 10.540 | 16.607 | 2.541      | 1.074              | 61.217 |
| TELL   | 13.470 | 13.972 | 5.112      | 1.209              | 56.174 |
| APPS   | 15.760 | 12.742 | 3.546      | 1.061              | 66.321 |
| CPRX   | 18.930 | 10.320 | 4.923      | 0.634              | 76.050 |
| VRAY   | 19.990 | 10.496 | 9.004      | 0.977              | 67.951 |
| OAS    | 27.260 | 43.796 | 6.663      | 0.823              | 79.271 |
| ENDP   | 28.970 | 28.630 | 7.775      | 0.917              | 82.565 |
| GPOR   | 31.790 | 16.424 | 5.200      | 0.954              | 79.379 |

**Table 6** The estimated parameters  $\lambda$ ,  $\eta$  and  $\alpha$  per symbol (from index 1 to 27). The significance level of the estimated parameters is denoted in number of stars next to the number. Three, two, and one star(s) are corresponding to the 1%, 5% and 10% significance levels. Note that  $\zeta$ ,  $\omega$  and  $\theta$  are computed from the estimated parameters and thus no significance is reported. Similarly,  $\beta$  has the same significance level as  $\alpha$  given the residual test in Subsection (F), and therefore is omitted here.

| symbol | Tick  | $\alpha$ | $\omega$ | $\lambda$  | $\eta$     | $\zeta$ | $\theta$ |
|--------|-------|----------|----------|------------|------------|---------|----------|
| ANSS   | 0.470 | 3.84***  | 5.137    | 0.00300*** | 0.00048*** | 4.725   | -2.116   |
| JKHY   | 0.700 | 5.23***  | 6.228    | 0.00312*** | 0.00047*** | 5.643   | -3.642   |
| FFIV   | 0.730 | 3.88**   | 5.370    | 0.00451*** | 0.00064*** | 5.069   | -1.620   |
| AZPN   | 0.780 | 2.81***  | 4.258    | 0.00375**  | 0.00059*** | 4.160   | -0.418   |
| PFPT   | 0.810 | 4.93***  | 5.504    | 0.00384**  | 0.00063*** | 5.493   | -0.058   |
| BLUE   | 0.910 | 7.12***  | 7.862    | 0.00793*** | 0.00102*** | 7.023   | -6.597   |
| NDAQ   | 1.010 | 5.73**   | 6.900    | 0.00475*** | 0.00058*** | 6.765   | -0.929   |
| MRTX   | 1.110 | 5.82**   | 6.870    | 0.01155*   | 0.00154*** | 6.370   | -3.433   |
| BPMC   | 1.210 | 2.74**   | 4.905    | 0.02186*** | 0.00278*** | 4.402   | -2.465   |
| GRMN   | 1.210 | 3.23***  | 4.467    | 0.00266*** | 0.00043*** | 4.442   | -0.112   |
| UTHR   | 1.230 | 4.33***  | 5.987    | 0.00673**  | 0.00091*** | 5.366   | -3.716   |
| INCY   | 1.250 | 3.17***  | 5.189    | 0.00531*** | 0.00064*** | 5.062   | -0.662   |
| VSAT   | 1.290 | 4.75**   | 5.666    | 0.00429**  | 0.00072*** | 5.029   | -3.609   |
| QRVO   | 1.350 | 3.75***  | 5.063    | 0.00300**  | 0.00047*** | 4.699   | -1.846   |
| EXPD   | 1.370 | 4.71***  | 5.806    | 0.00423*** | 0.00059*** | 5.800   | -0.030   |
| OLLI   | 1.410 | 5.22***  | 6.539    | 0.00464**  | 0.00060*** | 6.135   | -2.638   |
| AAXJ   | 1.490 | 5.51***  | 6.776    | 0.00060*** | 0.00008*** | 6.025   | -5.087   |
| YY     | 1.670 | 5.29***  | 6.335    | 0.00560*   | 0.00074*** | 6.294   | -0.263   |
| PFG    | 1.790 | 6.17***  | 7.040    | 0.00452*** | 0.00060*** | 6.629   | -2.894   |
| FIVN   | 1.790 | 4.17**   | 5.219    | 0.00626*** | 0.00097*** | 5.156   | -0.332   |
| BPOP   | 1.840 | 3.37***  | 4.682    | 0.00409*   | 0.00065*** | 4.532   | -0.703   |
| XRAY   | 1.860 | 4.22**   | 5.590    | 0.00289*** | 0.00043*** | 5.051   | -3.015   |
| AMBA   | 1.900 | 4.61***  | 6.085    | 0.00461*** | 0.00067*** | 5.245   | -5.115   |
| FLIR   | 1.940 | 4.65***  | 6.066    | 0.00486*** | 0.00064*** | 5.822   | -1.479   |
| GBT    | 1.960 | 5.84**   | 6.452    | 0.00719*   | 0.00112*** | 5.803   | -4.185   |
| APPN   | 2.140 | 4.46***  | 5.869    | 0.00766**  | 0.00108*** | 5.395   | -2.780   |
| HUBG   | 2.280 | 5.30*    | 6.180    | 0.00630*   | 0.00092*** | 5.871   | -1.909   |

**Table 7** The estimated parameters  $\lambda$ ,  $\eta$  and  $\alpha$  per symbol (from index 28 to 54). The significance level of the estimated parameters is denoted in number of stars next to the number. Three, two, and one star(s) are corresponding to the 1%, 5% and 10% significance levels. Note that  $\zeta$ ,  $\omega$  and  $\theta$  are computed from the estimated parameters and thus no significance is reported. Similarly,  $\beta$  has the same significance level as  $\alpha$  given the residual test in Subsection (F), and therefore is omitted here.

| symbol | Tick  | $\alpha$ | $\omega$ | $\lambda$  | $\eta$     | $\zeta$ | $\theta$ |
|--------|-------|----------|----------|------------|------------|---------|----------|
| FGEN   | 2.360 | 3.72***  | 4.938    | 0.00951**  | 0.00151*** | 4.763   | -0.865   |
| PLAY   | 2.480 | 3.82***  | 5.149    | 0.00629*** | 0.00097*** | 4.816   | -1.713   |
| ACGL   | 2.500 | 5.07**   | 5.930    | 0.00237*** | 0.00036*** | 5.567   | -2.152   |
| RGNX   | 2.520 | 5.67**   | 6.462    | 0.01711*** | 0.00250*** | 5.999   | -2.992   |
| PCRX   | 2.530 | 4.12***  | 5.260    | 0.00572**  | 0.00091*** | 4.927   | -1.749   |
| ADPT   | 2.670 | 3.67***  | 5.251    | 0.01618*   | 0.00236*** | 4.793   | -2.404   |
| MMSI   | 2.690 | 6.50***  | 6.587    | 0.00567**  | 0.00091*** | 6.133   | -2.993   |
| SHOO   | 2.950 | 7.06***  | 7.160    | 0.00425*   | 0.00061*** | 6.829   | -2.369   |
| MOMO   | 2.960 | 4.33**   | 6.338    | 0.00387*** | 0.00044*** | 6.081   | -1.630   |
| CORE   | 3.010 | 5.10**   | 5.986    | 0.00881**  | 0.00136*** | 5.522   | -2.782   |
| BECN   | 3.010 | 3.80***  | 5.061    | 0.00523*   | 0.00083*** | 4.725   | -1.697   |
| TLRY   | 3.060 | 7.45***  | 8.457    | 0.01177**  | 0.00126*** | 8.236   | -1.869   |
| ACIW   | 3.180 | 4.81**   | 5.945    | 0.00484**  | 0.00070*** | 5.618   | -1.946   |
| ARWR   | 3.220 | 5.28***  | 6.404    | 0.01086*** | 0.00142*** | 6.314   | -0.577   |
| CATM   | 3.300 | 3.04**   | 4.489    | 0.00603*   | 0.00096*** | 4.246   | -1.089   |
| SLGN   | 3.320 | 5.26**   | 5.826    | 0.00545**  | 0.00087*** | 5.630   | -1.140   |
| PPC    | 3.420 | 4.39***  | 5.450    | 0.00505*** | 0.00076*** | 5.355   | -0.514   |
| PDCE   | 3.550 | 5.65***  | 6.518    | 0.00692*** | 0.00099*** | 6.038   | -3.123   |
| APLS   | 3.670 | 4.11**   | 5.422    | 0.01067**  | 0.00157*** | 5.151   | -1.470   |
| FHB    | 3.810 | 5.11***  | 5.881    | 0.00531*** | 0.00079*** | 5.835   | -0.271   |
| VCYT   | 3.880 | 5.63***  | 6.046    | 0.01208**  | 0.00191*** | 5.874   | -1.040   |
| NSTG   | 3.970 | 4.88***  | 5.941    | 0.01186**  | 0.00171*** | 5.706   | -1.396   |
| RDUS   | 4.000 | 4.10**   | 5.912    | 0.01138**  | 0.00146*** | 5.408   | -2.980   |
| HCSG   | 4.010 | 6.29**   | 6.826    | 0.00686**  | 0.00102*** | 6.196   | -4.296   |
| NTNX   | 4.110 | 5.79***  | 7.481    | 0.00474*** | 0.00049*** | 7.454   | -0.205   |
| BCOR   | 4.160 | 3.95**   | 5.435    | 0.00974**  | 0.00146*** | 4.860   | -3.123   |
| IRDM   | 4.230 | 5.52**   | 6.595    | 0.00635**  | 0.00088*** | 6.062   | -3.516   |
| SABR   | 4.340 | 4.95**   | 6.003    | 0.00269*** | 0.00038*** | 5.807   | -1.177   |

**Table 8** The estimated parameters  $\lambda$ ,  $\eta$  and  $\alpha$  per symbol (from index 55 to 81). The significance level of the estimated parameters is denoted in number of stars next to the number. Three, two, and one star(s) are corresponding to the 1%, 5% and 10% significance levels. Note that  $\zeta$ ,  $\omega$  and  $\theta$  are computed from the estimated parameters and thus no significance is reported. Similarly,  $\beta$  has the same significance level as  $\alpha$  given the residual test in Subsection (F), and therefore is omitted here.

| symbol | Tick  | $\alpha$ | $\omega$ | $\lambda$  | $\eta$     | $\zeta$ | $\theta$ |
|--------|-------|----------|----------|------------|------------|---------|----------|
| SFIX   | 4.400 | 10.74**  | 12.832   | 0.00724*** | 0.00048*** | 12.722  | -1.401   |
| DENN   | 4.490 | 4.45***  | 5.748    | 0.00558**  | 0.00083*** | 5.205   | -3.121   |
| AERI   | 4.510 | 6.51***  | 7.294    | 0.00969*** | 0.00119*** | 7.259   | -0.256   |
| CARA   | 4.530 | 3.10***  | 4.918    | 0.01091*** | 0.00142*** | 4.822   | -0.474   |
| AIMT   | 4.610 | 7.87**   | 7.914    | 0.00999**  | 0.00129*** | 7.699   | -1.704   |
| IOVA   | 4.680 | 5.75***  | 7.160    | 0.01087*** | 0.00129*** | 6.798   | -2.590   |
| HAIN   | 4.730 | 4.56**   | 5.572    | 0.00410*** | 0.00064*** | 5.226   | -1.931   |
| MTSI   | 4.980 | 5.14***  | 6.343    | 0.00758**  | 0.00105*** | 5.862   | -3.050   |
| BLDR   | 5.130 | 5.41**   | 6.413    | 0.00393*** | 0.00055*** | 6.063   | -2.240   |
| PENN   | 5.210 | 4.11*    | 5.514    | 0.00502*** | 0.00071*** | 5.292   | -1.225   |
| GOSS   | 5.240 | 4.27**   | 6.026    | 0.01731**  | 0.00220*** | 5.572   | -2.737   |
| INSM   | 5.330 | 4.38***  | 5.595    | 0.00976**  | 0.00142*** | 5.382   | -1.194   |
| HOMB   | 5.360 | 3.37**   | 4.668    | 0.00648*** | 0.00105*** | 4.474   | -0.905   |
| HRTX   | 5.400 | 9.91***  | 9.513    | 0.00616**  | 0.00073*** | 8.809   | -6.698   |
| LSCC   | 5.410 | 6.28***  | 7.018    | 0.00628*** | 0.00085*** | 6.633   | -2.705   |
| FATE   | 5.580 | 3.61***  | 5.377    | 0.01092**  | 0.00149*** | 4.918   | -2.466   |
| PETS   | 5.610 | 2.34**   | 3.967    | 0.00952**  | 0.00145*** | 3.875   | -0.366   |
| SVMK   | 5.690 | 6.95***  | 7.904    | 0.00614*** | 0.00072*** | 7.481   | -3.345   |
| ONB    | 5.830 | 4.81*    | 6.263    | 0.00272*** | 0.00034*** | 6.068   | -1.221   |
| TVTY   | 5.910 | 5.57***  | 7.792    | 0.00883*** | 0.00085*** | 7.404   | -3.020   |
| LAUR   | 6.050 | 2.96***  | 4.775    | 0.00244*** | 0.00038*** | 3.948   | -3.947   |
| UMPQ   | 6.140 | 3.26*    | 4.837    | 0.00242*** | 0.00035*** | 4.678   | -0.771   |
| CVET   | 6.150 | 2.71***  | 4.967    | 0.00681*** | 0.00094*** | 3.930   | -5.154   |
| HALO   | 6.170 | 3.60***  | 5.092    | 0.00901*** | 0.00131*** | 4.864   | -1.158   |
| RTRX   | 6.620 | 4.99*    | 6.186    | 0.01371*** | 0.00197*** | 5.611   | -3.559   |
| UPWK   | 6.670 | 3.13***  | 5.142    | 0.00749*** | 0.00108*** | 4.239   | -4.646   |
| MRNA   | 6.690 | 9.04***  | 9.712    | 0.01044*** | 0.00108*** | 8.991   | -7.004   |
| IMMU   | 6.760 | 7.01**   | 8.540    | 0.00705*** | 0.00071*** | 8.106   | -3.698   |

**Table 9** The estimated parameters  $\lambda$ ,  $\eta$  and  $\alpha$  per symbol (from index 82 to 110). The significance level of the estimated parameters is denoted in number of stars next to the number. Three, two, and one star(s) are corresponding to the 1%, 5% and 10% significance levels. Note that  $\zeta$ ,  $\omega$  and  $\theta$  are computed from the estimated parameters and thus no significance is reported. Similarly,  $\beta$  has the same significance level as  $\alpha$  given the residual test in Subsection (F), and therefore is omitted here.

| symbol | Tick   | $\alpha$ | $\omega$ | $\lambda$  | $\eta$     | $\zeta$ | $\theta$ |
|--------|--------|----------|----------|------------|------------|---------|----------|
| GLNG   | 6.900  | 3.64***  | 5.368    | 0.00601*** | 0.00081*** | 5.017   | -1.889   |
| FEYE   | 6.940  | 4.92***  | 5.842    | 0.00137*** | 0.00022*** | 5.316   | -3.072   |
| REGI   | 7.040  | 8.47*    | 8.100    | 0.01099*** | 0.00164*** | 6.984   | -9.037   |
| GT     | 7.290  | 5.38**   | 6.061    | 0.00199*** | 0.00029*** | 6.022   | -0.236   |
| NWSA   | 7.320  | 3.98***  | 5.670    | 0.00094*** | 0.00014*** | 4.775   | -5.077   |
| CHNG   | 7.450  | 5.63**   | 6.525    | 0.00698*** | 0.00106*** | 5.693   | -5.427   |
| QNST   | 7.500  | 5.29**   | 6.698    | 0.00898*** | 0.00125*** | 5.654   | -6.996   |
| NAVI   | 7.660  | 4.22**   | 6.228    | 0.00129*** | 0.00017*** | 5.104   | -7.000   |
| WIFI   | 7.760  | 5.88***  | 7.277    | 0.01230*** | 0.00167*** | 5.942   | -9.714   |
| SONO   | 7.870  | 8.47**   | 9.878    | 0.00457*** | 0.00044*** | 8.894   | -9.722   |
| PAYS   | 7.930  | 3.69**   | 5.592    | 0.01323*** | 0.00179*** | 4.858   | -4.106   |
| ISBC   | 8.810  | 5.83***  | 7.009    | 0.00114*** | 0.00014*** | 6.729   | -1.963   |
| TTMI   | 8.980  | 5.34*    | 6.111    | 0.00575*** | 0.00092*** | 5.454   | -4.011   |
| VLY    | 9.220  | 5.28**   | 6.311    | 0.00121*** | 0.00017*** | 6.145   | -1.050   |
| AMAG   | 9.280  | 5.66**   | 6.712    | 0.01436*** | 0.00188*** | 6.442   | -1.813   |
| SGMO   | 9.500  | 4.33**   | 5.845    | 0.01025*** | 0.00142*** | 5.363   | -2.817   |
| MDRX   | 9.640  | 5.30**   | 6.134    | 0.00237*** | 0.00037*** | 5.537   | -3.666   |
| FLEX   | 9.750  | 4.37**   | 5.754    | 0.00077*** | 0.00012*** | 4.983   | -4.435   |
| PBYI   | 10.040 | 5.31**   | 7.146    | 0.01393*** | 0.00157*** | 6.604   | -3.875   |
| IRWD   | 10.540 | 6.86***  | 7.059    | 0.00823*** | 0.00124*** | 6.444   | -4.336   |
| TELL   | 13.470 | 8.43***  | 9.317    | 0.01094*** | 0.00117*** | 8.436   | -8.214   |
| APPS   | 15.760 | 4.88***  | 6.745    | 0.00760*** | 0.00092*** | 5.981   | -5.153   |
| CPRX   | 18.930 | 5.45*    | 6.993    | 0.00612*** | 0.00075*** | 6.352   | -4.488   |
| VRAY   | 19.990 | 6.50**   | 6.749    | 0.00577**  | 0.00089*** | 6.252   | -3.351   |
| OAS    | 27.260 | 2.17**   | 3.823    | 0.00104*** | 0.00016*** | 3.702   | -0.459   |
| ENDP   | 28.970 | 4.59**   | 6.136    | 0.00189*** | 0.00025*** | 5.732   | -2.480   |
| GPOR   | 31.790 | 4.34**   | 6.150    | 0.00202*** | 0.00026*** | 5.388   | -4.682   |

**Table 10** The cost measures per symbol (from index 1 to 27).  $C_R$  is the square-root cost per share, while  $C_S$  is the fixed cost per share, as explained in Subsection (E)

| symbol | Tick  | $C_R$ (bps/share) | $C_S$ (bps/share) | TWAP  | Opt   | $r_{TWAP}(\%)$ |
|--------|-------|-------------------|-------------------|-------|-------|----------------|
| ANSS   | 0.470 | 68.748            | 37.985            | 0.141 | 0.122 | 13.361         |
| JKHY   | 0.700 | 45.798            | 33.821            | 0.120 | 0.108 | 10.099         |
| FFIV   | 0.730 | 83.012            | 108.220           | 0.287 | 0.234 | 18.521         |
| AZPN   | 0.780 | 98.851            | 48.599            | 0.109 | 0.071 | 34.843         |
| PFPT   | 0.810 | 87.327            | 75.574            | 0.082 | 0.031 | 62.834         |
| BLUE   | 0.910 | 113.948           | 176.070           | 0.552 | 0.511 | 7.394          |
| NDAQ   | 1.010 | 55.335            | 91.990            | 0.102 | 0.065 | 36.548         |
| MRTX   | 1.110 | 135.234           | 171.453           | 0.437 | 0.381 | 12.716         |
| BPMC   | 1.210 | 77.781            | 114.860           | 0.462 | 0.414 | 10.407         |
| GRMN   | 1.210 | 59.715            | 67.420            | 0.107 | 0.051 | 52.416         |
| UTHR   | 1.230 | 71.092            | 95.864            | 0.357 | 0.324 | 9.181          |
| INCY   | 1.250 | 79.090            | 154.203           | 0.247 | 0.164 | 33.657         |
| VSAT   | 1.290 | 53.640            | 40.780            | 0.190 | 0.173 | 8.583          |
| QRVO   | 1.350 | 66.244            | 87.375            | 0.303 | 0.257 | 15.008         |
| EXPD   | 1.370 | 55.822            | 96.190            | 0.087 | 0.029 | 66.382         |
| OLLI   | 1.410 | 159.046           | 177.617           | 0.410 | 0.346 | 15.506         |
| AAXJ   | 1.490 | 35.559            | 19.649            | 0.072 | 0.066 | 7.803          |
| YY     | 1.670 | 93.979            | 177.333           | 0.164 | 0.073 | 55.151         |
| PFG    | 1.790 | 69.884            | 163.553           | 0.346 | 0.292 | 15.746         |
| FIVN   | 1.790 | 104.424           | 95.314            | 0.139 | 0.076 | 45.489         |
| BPOP   | 1.840 | 64.878            | 71.080            | 0.166 | 0.118 | 29.154         |
| XRAY   | 1.860 | 49.156            | 123.477           | 0.482 | 0.431 | 10.416         |
| AMBA   | 1.900 | 154.226           | 149.746           | 0.734 | 0.688 | 6.241          |
| FLIR   | 1.940 | 72.717            | 128.638           | 0.240 | 0.184 | 23.456         |
| GBT    | 1.960 | 92.819            | 133.398           | 0.500 | 0.455 | 9.101          |
| APPN   | 2.140 | 119.067           | 106.777           | 0.339 | 0.297 | 12.408         |
| HUBG   | 2.280 | 72.651            | 36.870            | 0.082 | 0.066 | 19.405         |

**Table 11** The cost measures per symbol (from index 28 to 54).  $C_R$  is the square-root cost per share, while  $C_S$  is the fixed cost per share, as explained in Subsection (E)

| symbol | Tick  | $C_R$ (bps/share) | $C_S$ (bps/share) | TWAP  | Opt   | $r_{TWAP}$ (%) |
|--------|-------|-------------------|-------------------|-------|-------|----------------|
| FGEN   | 2.360 | 102.550           | 145.804           | 0.340 | 0.248 | 27.136         |
| PLAY   | 2.480 | 69.588            | 123.334           | 0.387 | 0.323 | 16.558         |
| ACGL   | 2.500 | 53.453            | 118.593           | 0.321 | 0.269 | 16.398         |
| RGNX   | 2.520 | 140.136           | 231.109           | 0.640 | 0.555 | 13.379         |
| PCRX   | 2.530 | 78.489            | 88.737            | 0.275 | 0.229 | 16.757         |
| ADPT   | 2.670 | 150.501           | 128.465           | 0.476 | 0.419 | 12.078         |
| MMSI   | 2.690 | 169.474           | 109.786           | 0.306 | 0.264 | 13.783         |
| SHOO   | 2.950 | 119.596           | 112.714           | 0.210 | 0.169 | 19.458         |
| MOMO   | 2.960 | 130.585           | 314.685           | 0.520 | 0.401 | 22.901         |
| CORE   | 3.010 | 121.410           | 141.637           | 0.453 | 0.395 | 12.806         |
| BECN   | 3.010 | 118.883           | 83.621            | 0.275 | 0.231 | 16.275         |
| TLRY   | 3.060 | 137.281           | 293.005           | 0.285 | 0.204 | 28.571         |
| ACIW   | 3.180 | 79.399            | 112.002           | 0.272 | 0.223 | 18.090         |
| ARWR   | 3.220 | 118.246           | 330.965           | 0.362 | 0.206 | 43.249         |
| CATM   | 3.300 | 102.179           | 71.481            | 0.228 | 0.182 | 20.266         |
| SLGN   | 3.320 | 44.417            | 60.186            | 0.118 | 0.086 | 27.140         |
| PPC    | 3.420 | 80.417            | 158.833           | 0.241 | 0.145 | 39.838         |
| PDCE   | 3.550 | 156.319           | 357.596           | 0.993 | 0.865 | 12.958         |
| APLS   | 3.670 | 157.965           | 199.408           | 0.497 | 0.396 | 20.421         |
| FHB    | 3.810 | 60.171            | 115.412           | 0.129 | 0.061 | 52.359         |
| VCYT   | 3.880 | 147.612           | 245.324           | 0.422 | 0.295 | 30.059         |
| NSTG   | 3.970 | 167.450           | 230.058           | 0.456 | 0.347 | 23.924         |
| RDUS   | 4.000 | 107.158           | 151.290           | 0.472 | 0.417 | 11.629         |
| HCSG   | 4.010 | 100.177           | 88.628            | 0.290 | 0.262 | 9.752          |
| NTNX   | 4.110 | 105.975           | 299.902           | 0.178 | 0.066 | 63.005         |
| BCOR   | 4.160 | 145.431           | 161.679           | 0.690 | 0.625 | 9.487          |
| IRDM   | 4.230 | 121.029           | 160.520           | 0.466 | 0.412 | 11.597         |
| SABR   | 4.340 | 45.760            | 86.474            | 0.152 | 0.110 | 27.456         |

**Table 12** The cost measures per symbol (from index 55 to 81).  $C_R$  is the square-root cost per share, while  $C_S$  is the fixed cost per share, as explained in Subsection (E)

| symbol | Tick  | $C_R$ (bps/share) | $C_S$ (bps/share) | TWAP  | Opt   | $r_{TWAP}(\%)$ |
|--------|-------|-------------------|-------------------|-------|-------|----------------|
| SFIX   | 4.400 | 114.110           | 461.443           | 0.136 | 0.071 | 47.740         |
| DENN   | 4.490 | 52.704            | 77.782            | 0.292 | 0.261 | 10.508         |
| AERI   | 4.510 | 139.967           | 272.170           | 0.190 | 0.076 | 59.864         |
| CARA   | 4.530 | 128.853           | 204.231           | 0.332 | 0.207 | 37.727         |
| AIMT   | 4.610 | 205.796           | 578.042           | 0.674 | 0.482 | 28.483         |
| IOVA   | 4.680 | 112.071           | 387.380           | 0.689 | 0.565 | 17.936         |
| HAIN   | 4.730 | 90.818            | 105.984           | 0.308 | 0.257 | 16.613         |
| MTSI   | 4.980 | 156.338           | 268.951           | 0.765 | 0.667 | 12.728         |
| BLDR   | 5.130 | 83.686            | 144.894           | 0.323 | 0.266 | 17.654         |
| PENN   | 5.210 | 67.629            | 142.904           | 0.302 | 0.229 | 24.155         |
| GOSS   | 5.240 | 193.095           | 216.793           | 0.606 | 0.526 | 13.173         |
| INSM   | 5.330 | 126.153           | 293.323           | 0.604 | 0.453 | 25.056         |
| HOMB   | 5.360 | 81.269            | 138.495           | 0.372 | 0.281 | 24.588         |
| HRTX   | 5.400 | 237.154           | 656.579           | 1.268 | 1.140 | 10.113         |
| LSCC   | 5.410 | 129.356           | 339.207           | 0.697 | 0.581 | 16.745         |
| FATE   | 5.580 | 160.337           | 255.260           | 0.882 | 0.774 | 12.228         |
| PETS   | 5.610 | 134.171           | 101.666           | 0.241 | 0.158 | 34.440         |
| SVMK   | 5.690 | 95.742            | 152.292           | 0.261 | 0.219 | 16.086         |
| ONB    | 5.830 | 58.194            | 79.312            | 0.122 | 0.088 | 28.042         |
| TVTY   | 5.910 | 144.991           | 241.729           | 0.356 | 0.294 | 17.408         |
| LAUR   | 6.050 | 88.242            | 95.596            | 0.690 | 0.654 | 5.263          |
| CVET   | 6.150 | 279.666           | 319.957           | 2.484 | 2.390 | 3.810          |
| HALO   | 6.170 | 65.524            | 176.743           | 0.431 | 0.332 | 22.830         |
| RTRX   | 6.620 | 170.683           | 261.373           | 0.905 | 0.812 | 10.257         |
| UPWK   | 6.670 | 82.056            | 124.614           | 0.829 | 0.788 | 4.911          |
| MRNA   | 6.690 | 102.223           | 419.080           | 0.748 | 0.674 | 9.950          |
| IMMU   | 6.760 | 148.241           | 421.324           | 0.604 | 0.506 | 16.224         |

**Table 13** The cost measures per symbol (from index 82 to 110).  $C_R$  is the square-root cost per share, while  $C_S$  is the fixed cost per share, as explained in Subsection (E)

| symbol | Tick   | $C_R$ (bps/share) | $C_S$ (bps/share) | TWAP  | Opt   | $r_{TWAP}(\%)$ |
|--------|--------|-------------------|-------------------|-------|-------|----------------|
| GLNG   | 6.900  | 134.107           | 204.667           | 0.583 | 0.489 | 16.051         |
| FEYE   | 6.940  | 76.399            | 123.090           | 0.455 | 0.405 | 11.013         |
| REGI   | 7.040  | 99.314            | 203.394           | 0.850 | 0.803 | 5.603          |
| GT     | 7.290  | 71.808            | 88.165            | 0.091 | 0.041 | 55.051         |
| NWSA   | 7.320  | 37.404            | 22.306            | 0.129 | 0.122 | 5.403          |
| CHNG   | 7.450  | 87.843            | 146.305           | 0.657 | 0.613 | 6.649          |
| QNST   | 7.500  | 170.589           | 144.054           | 0.731 | 0.695 | 4.899          |
| NAVI   | 7.660  | 71.902            | 36.506            | 0.215 | 0.206 | 4.129          |
| WIFI   | 7.760  | 181.352           | 450.175           | 2.511 | 2.421 | 3.570          |
| SONO   | 7.870  | 122.412           | 203.433           | 0.446 | 0.404 | 9.526          |
| PAYS   | 7.930  | 131.132           | 151.647           | 0.720 | 0.669 | 7.069          |
| ISBC   | 8.810  | 36.387            | 28.502            | 0.045 | 0.035 | 22.266         |
| TTMI   | 8.980  | 88.596            | 93.264            | 0.389 | 0.355 | 8.677          |
| VLY    | 9.220  | 40.365            | 24.387            | 0.036 | 0.025 | 31.227         |
| AMAG   | 9.280  | 133.055           | 180.220           | 0.308 | 0.239 | 22.543         |
| SGMO   | 9.500  | 80.458            | 254.180           | 0.814 | 0.715 | 12.150         |
| MDRX   | 9.640  | 66.643            | 72.959            | 0.276 | 0.249 | 9.756          |
| FLEX   | 9.750  | 69.527            | 39.776            | 0.202 | 0.189 | 6.755          |
| PBYI   | 10.040 | 147.196           | 289.481           | 0.675 | 0.595 | 11.861         |
| IRWD   | 10.540 | 83.468            | 306.640           | 0.943 | 0.846 | 10.220         |
| TELL   | 13.470 | 154.455           | 357.936           | 0.823 | 0.759 | 7.745          |
| APPS   | 15.760 | 106.590           | 237.706           | 0.832 | 0.769 | 7.605          |
| CPRX   | 18.930 | 192.866           | 326.459           | 0.944 | 0.853 | 9.657          |
| VRAY   | 19.990 | 241.404           | 170.761           | 0.480 | 0.419 | 12.692         |
| OAS    | 27.260 | 125.666           | 68.967            | 0.190 | 0.134 | 29.635         |
| ENDP   | 28.970 | 195.489           | 172.958           | 0.439 | 0.373 | 15.002         |
| GPOR   | 31.790 | 144.696           | 139.360           | 0.583 | 0.541 | 7.194          |

## References

- Anderson TW, Darling DA (1952) Asymptotic theory of certain "goodness of fit" criteria based on stochastic processes. *The Annals of Mathematical Statistics* 23(2):193 – 212.
- Cartea Á, Jaimungal S (2015) Optimal execution with limit and market orders. *Quantitative Finance* 15(8):1279–1291.
- Chen Y, Gao X, Li D (2018) Optimal order execution using hidden orders. *Journal of Economic Dynamics and Control* 94(C):89–116.
- Cont R, Kukanov A, Stoikov S (2013) The price impact of order book events. *Journal of Financial Econometrics* 12(1):47–88.
- Daley DJ, Vere-Jones D (2003) *An introduction to the theory of point processes. Vol. I. Probability and its Applications* (New York) (New York: Springer-Verlag), second edition, ISBN 0-387-95541-0.
- Filimonov V, Sornette D (2015) Apparent criticality and calibration issues in the Hawkes self-excited point process model: application to high-frequency financial data. *Quantitative Finance* 15(8):1293–1314.
- Gatheral J (2011) No-dynamic-arbitrage and market impact. *Quantitative Finance* 10:749–759.
- Gramacki A (2017) *Nonparametric Kernel Density Estimation and Its Computational Aspects* (Springer-Verlag), first edition, ISBN 3319716875.
- Hawkes AG (2018) Hawkes processes and their applications to finance: a review. *Quantitative Finance* 18(2):193–198.
- Tóth B, Lempérière Y, Deremble C, de Lataillade J, Kockelkoren J, Bouchaud JP (2011) Anomalous price impact and the critical nature of liquidity in financial markets. *Physical Review X* 1:021006.
- Tóth B, Palit I, Lillo F, Farmer J (2014) Why is order flow so persistent? *Journal of Economic Dynamics and Control* 51:218–239, URL <http://dx.doi.org/10.1016/j.jedc.2014.10.007>.
- Wehrli A, Wheatley S, Sornette D (2021) Scale-, time- and asset-dependence of Hawkes process estimates on high frequency price changes. *Quantitative Finance* 21(5):729–752.
- Zhu L (2015) Large deviations for markovian nonlinear hawkes processes. *The Annals of Applied Probability* 25(2):548–581.
